# Supplementary material
Source: PubMed Central journal article supplement (PMC5865635)
Supplement: NIHMS948128-supplement-Supplemental_Material.pdf [file NIHMS948128-supplement-Supplemental_Material.pdf]

## SUPPLEMENTAL MATERIAL

**Table S1.** Baseline characteristics of the study population

| Characteristics                     | Total sample          | Sub-sample<br>with <i>ADM</i> expression |
|-------------------------------------|-----------------------|------------------------------------------|
| n                                   | 4155                  | 1372                                     |
| Female sex, n (%)                   | 2031 (48.9)           | 667 (48.6)                               |
| Age, yrs                            | 55.7 ± 10.9           | 55.2 ± 10.9                              |
| Body mass index, kg.m <sup>-2</sup> | 27.2 ± 4.8            | 26.9 ± 4.5                               |
| Current smoker, n (%)               | 789 (19.0%)           | 257 (18.8%)                              |
| Diabetes, n (%)                     | 303 (7.3%)            | 101 (7.4%)                               |
| Hypertension, n (%)                 | 2140 (51.5%)          | 681 (49.6%)                              |
| Biomarkers                          |                       |                                          |
| Creatinine (mg/dL)                  | 0.88 (0.79 – 0.98)    | 0.88 (0.79 – 0.97)                       |
| CRP, mg/L                           | 1.60 (0.94 – 3.20)    | 1.70 (0.97 – 3.20)                       |
| NT-proBNP (pg/mL)                   | 69.1 (34.9 – 132.6)   | 65.5 (34.4 – 128.4)                      |
| MPO (pmol/L)                        | 298.3 (236.9 – 372.7) | 310.2 (242.1 – 385.3)                    |
| IL-18 (pg/mL)                       | 217.4 (168.2 – 282.7) | 216.7 (169.5 – 284.7)                    |
| IL-1Ra (pg/mL)                      | 320.0 (241.0 – 427.9) | 305.0 (224.5 – 415.3)                    |
| CT-proET-1 (pmol/L)                 | 59.1 (50.8 – 68.2)    | 60.0 (52.8 – 68.3)                       |
| MR-proADM, nmol/L                   | 0.46 (0.40 – 0.55)    | 0.45 (0.39 – 0.53)                       |
| Vascular parameters                 |                       |                                          |
| Reflection index, %                 | 67.0 ± 15.0           | 66.9 ± 15.1                              |
| Stiffness index, m/s                | 9.32 ± 2.99           | 9.29 ± 3.06                              |
| Mean intima-media thickness, mm     | 0.65 ± 0.13           | 0.65 ± 0.13                              |
| <i>ADM</i> gene expression          | -                     | 8.85 ± 0.38                              |

Values are mean ± SD, median (25<sup>th</sup> – 75<sup>th</sup> interquartile range) or n (%).

**Table S2.** Association of monocyte *ADM* gene expression and plasma MR-proADM levels with cardiovascular risk factors (n = 1372)

| Risk factor                 | <i>ADM</i> gene expression |       |         |                    | Plasma MR-proADM (log) |       |         |                    |
|-----------------------------|----------------------------|-------|---------|--------------------|------------------------|-------|---------|--------------------|
|                             | Coefficient                | SE    | p-value | R <sup>2</sup> (%) | Coefficient            | SE    | p-value | R <sup>2</sup> (%) |
| Age (yrs)                   | 0.002                      | 0.001 | 0.035   | 0.32               | 0.013                  | 0.001 | <.0001  | 33.08              |
| Sex (male vs female)        | -0.166                     | 0.020 | <.0001  | 4.65               | 0.020                  | 0.013 | 0.127   | 0.17               |
| BMI (kg/m <sup>2</sup> )    | 0.009                      | 0.002 | <.0001  | 1.16               | 0.024                  | 0.001 | <.0001  | 18.93              |
| Diabetes (yes vs no)        | 0.044                      | 0.040 | 0.271   | 0.09               | 0.210                  | 0.025 | <.0001  | 4.91               |
| Hypertension (yes vs no)    | 0.006                      | 0.007 | 0.765   | 0.02               | 0.163                  | 0.013 | <.0001  | 10.75              |
| Current smoking (yes vs no) | 0.057                      | 0.026 | 0.032   | 0.33               | -0.026                 | 0.017 | 0.134   | 0.16               |

Data are coefficients from univariate regression analysis of *ADM* expression and log-transformed MR-proADM levels, respectively, on each single risk factor
